# Supplementary material for: S-doped TiN supported N, P, S-tridoped TiO2 with hetero-phase junctions for fuel cell startup/shutdown durability
Source: Royal Society of Chemistry journal article supplement (doi:10.1039/d4ta01475h), 2024-01-01
Supplement: d4ta01475h1.pdf [file d4ta01475h1.pdf]

## Supplementary Information

### **S-doped TiN Supported N, P, S-tridoped TiO<sub>2</sub> with Hetero-phase Junctions for Fuel Cell Startup/Shutdown Durability**

*Mitsuharu Chisaka,\* Jubair A. Shamim, Wei-Lun Hsu and Hirofumi Daiguji*

M. Chisaka

Department of Sustainable Energy, Hirosaki University, 3 Bunkyo-cho, Hirosaki, Aomori 036-8561, Japan. E-mail: chisaka@hirosaki-u.ac.jp.

J. A. Shamim, W.-L. Hsu and H. Daiguji

Department of Mechanical Engineering, The University of Tokyo, 7-3-1, Hongo, Bunkyo-ku, Tokyo 113-8656, Japan.

## S1. Experimental details

**Catalyst synthesis:** N, P-TiO<sub>2</sub>/S-TiN catalysts were synthesized using a recently reported solution phase combustion route<sup>S1</sup> then they were converted to N, P, S-TiO<sub>2</sub>/S-TiN catalysts by an annealing step developed in this study. First, 0.49 g of titanium oxysulfate powder (TiOSO<sub>4</sub>·*n*H<sub>2</sub>O; *n* ≐ 1~2, Kishida Chemical Co. Ltd., Osaka, Osaka, Japan) was dispersed in 371 cm<sup>3</sup> of distilled water by stirring at room temperature in a polytetrafluoroethylene (PTFE) beaker whose outside bottom was coated with a PTFE-carbon composite to facilitate heating on a hot stirrer. Second, 97 mm<sup>3</sup> of 30% w/w H<sub>3</sub>PO<sub>2</sub> solution (Fuji Film Wako Pure Chemical Co., Osaka, Osaka, Japan) was added with continuous stirring to set the optimum atomic ratio of phosphorous to titanium, 0.20.<sup>S1</sup> Third, 20 g of urea powder ((NH<sub>2</sub>)<sub>2</sub>CO, Fuji Film Wako Pure Chemical Co., Osaka, Osaka, Japan) was added to set the mass ratio of urea to TiOSO<sub>4</sub>-derived TiO<sub>2</sub> at 100. Fourth, 36 cm<sup>3</sup> of 35% w/w HCl solution (Kishida Chemical Co. Ltd., Osaka, Osaka, Japan) was added to the solution with continuous stirring. Then, the PTFE beaker was placed on another stirrer preheated to 523 K and stirred continuously until the water evaporated. Fifth, the beaker was then placed onto a hot plate that was preheated to 473 K and kept overnight. The mixing and drying procedures, i.e., all of the first to fifth steps were performed in a fume hood. After the drying, the obtained powders were ground using an agate mortar and placed in an alumina boat. The boat was set in a horizontal quartz-tube furnace that was placed in the fume hood. The tube was slowly evacuated and purged with N<sub>2</sub> gas. The powder samples were heated from room temperature to 1,173 K at a rate of 10 K min<sup>-1</sup> and maintained for 2 h. The 1,173 K of pyrolysis temperature is 50 K higher than the previously optimized 1,123 K,<sup>S1</sup> as a larger furnace with a larger tube was used in this study to increase the batch size. The samples were then cooled to room temperature at an uncontrolled rate. The N<sub>2</sub> flow rate was 0.1 dm<sup>3</sup> min<sup>-1</sup> during pyrolysis. After pyrolysis, the powders were ground in an agate mortar to obtain N, P-TiO<sub>2</sub>/S-TiN. Some solid by-products

attached to the inner wall of the quartz tube during pyrolysis, which can stop the gas flow if they block the narrow opening of the quartz tube. Therefore, a quartz tube more than three times longer than the heating zone was used to provide sufficient space for by-product accumulation inside the tube to avoid blockage by solid by-products. The by-products were removed by washing the tube with water and heating without any sample in air at 1,300 K for ca. 2 h. The obtained N, P-TiO<sub>2</sub>/S-TiN catalysts and ammonia fluoride (NH<sub>4</sub>F, Fuji Film Wako Pure Chemical Co., Osaka, Osaka, Japan) were ground in an agate mortar then the mixture was placed in an alumina boat and then the boat was placed in another horizontal quartz tube furnace, purged with flowing N<sub>2</sub> gas for at least 600 s. Then the mixture samples were heated from room temperature to various temperatures at a rate of ca. 20 K min<sup>-1</sup>. The duration, N<sub>2</sub> flow rate and the mass ratio of NH<sub>4</sub>F to N, P-TiO<sub>2</sub>/S-TiN were set at 1 h, 0.5 dm<sup>3</sup> min<sup>-1</sup> and 3, respectively unless otherwise noted. Finally, the samples were cooled without controlling the cooling rate to obtain N, P, S-TiO<sub>2</sub>/S-TiN. After the annealing, the tube was washed with water then heated without any sample in air at 1,300 K for ca. 2 h to remove any byproducts. All the steps for synthesizing N, P, S-TiO<sub>2</sub>/S-TiN from N, P-TiO<sub>2</sub>/S-TiN were performed in the fume hood. For reference, TiOSO<sub>4</sub>·nH<sub>2</sub>O was replaced with a sulfur-free titanium source, diammonium hexafluorotitanate ((NH<sub>4</sub>)<sub>2</sub>TiF<sub>6</sub>, Fuji Film Wako Pure Chemical Co., Osaka, Osaka, Japan) then N, P-TiO<sub>2</sub>/TiN catalysts were synthesized under conditions identical to those of N, P, S-TiO<sub>2</sub>/S-TiN catalysts which exhibited the highest oxygen reduction reaction (ORR) activity.

**Characterization:** The bulk crystal structures of N, P-TiO<sub>2</sub>/S-TiN and N, P, S-TiO<sub>2</sub>/S-TiN catalysts were evaluated using an X-ray diffractometer (MiniFlex 600, Rigaku Co., Akishima, Tokyo, Japan) with Cu-K $\alpha$  radiation generated at 40 kV and 15 mA (scan range = 20–80°, step size = 0.02°, and scan rate = 2° min<sup>-1</sup>). The crystal structure of the outermost surface of N, P, S-TiO<sub>2</sub>/S-TiN was evaluated using a Raman spectrometer (LabRAM HR-evolution, Horiba Scientific Co. Ltd., Kyoto, Kyoto,

Japan) equipped with a 325 nm laser. The morphology of the catalysts was investigated using a transmission electron microscope (JEM-2100, JEOL Inc., Akishima, Tokyo, Japan). The chemical states of the catalysts were determined using an X-ray photoelectron (XP) spectrometer (PHI VersaProbeIII, ULVAC-PHI, Inc., Chigasaki, Kanagawa, Japan) with an Al-K $\alpha$  X-ray source (1486.6 eV). The peak shifts due to surface charge were corrected using the binding energy of the C 1s (284.8 eV) of the organic contaminants from the spectrometer and/or air. The Ti 2p, N 1s and S 2p spectra were analyzed by fitting six, four and four symmetric peaks, respectively, after subtracting a Shirley-type background. The bulk composition of the catalysts was determined using an energy dispersive (ED) X-ray spectrometer (JED-2300F, JEOL Inc., Akishima, Tokyo, Japan).

**ORR activity and selectivity measurements:** Rotating disk electrode (RDE) and rotating ring-disk electrode (RRDE) voltammograms were obtained to evaluate the ORR activity and selectivity, respectively, of the catalysts. The catalyst, 5% w/w Nafion® ionomer solution (510211, Sigma-Aldrich Co., St. Louis, Missouri, U.S.), and isopropyl alcohol were sonicated for 1200 s and then further mixed using a planetary mixer (Mazaru Star KK-250S, Kurabo Co., Osaka, Osaka, Japan) for 180 s to obtain a homogeneous catalyst ink. The mass fraction of Nafion in the catalyst layer was set at 0.05. The catalyst loading,  $m$ , was constant at 0.86 mg cm<sup>-2</sup>, unless otherwise noted, by dropping 6.4 mm<sup>3</sup> of the catalyst ink onto a glassy carbon (GC) disk (4 mm diameter)–platinum ring (5 mm inner diameter and 7 mm outer diameter) electrode (012613, BAS Co., Sumida-ku, Tokyo, Japan). Prior to the treatment, the surface of the GC disk electrode was polished with 1.0- and 0.05- $\mu$ m alumina slurries, cleaned with distilled water and ethanol, and then air-dried at 320 K for at least 600 s. A conventional three-electrode cell was used for the room-temperature electrochemical measurements performed in 0.1 mol dm<sup>-3</sup> H<sub>2</sub>SO<sub>4</sub> solution. The catalyst-coated GC disk–Pt ring electrode, a carbon rod (diameter: 5 mm, C-072591, Nilaco Co., Chuo-ku, Tokyo, Japan), and a Ag/AgCl

(sat. KCl) electrode (HS-205C, TOA DKK Co., Shinjuku-ku, Tokyo, Japan) were used as the working, counter, and reference electrodes, respectively. The working electrode was placed on a rotator (RRDE-3A, BAS Co., Sumida-ku, Tokyo, Japan). All the working electrode potentials were referenced to the reversible hydrogen electrode (RHE). After sequentially bubbling O<sub>2</sub> and N<sub>2</sub> for 1800 s, the RDE and RRDE voltammograms were recorded by applying a disk potential,  $E_d$ , from 1.2 to 0.1 V at a cathodic scan rate of 5 mV s<sup>-1</sup> and a rotation speed of 1500 rpm using a bipotentiostat (Model 2323, 700B or 704B, BAS Co., Sumida-ku, Tokyo, Japan). The ring potential was maintained at 1.2 V to obtain the RRDE voltammograms. The ORR current density was measured after the background correction by  $j = j_O - j_N$ , the difference between the current per unit geometrical area of the GC disk electrode obtained in O<sub>2</sub>- ( $j_O$ ) and in N<sub>2</sub>-saturated electrolyte ( $j_N$ ). The hydrogen peroxide yield,  $X_{H_2O_2}$ , and number of electrons transferred per unit oxygen molecule,  $n$ , were calculated by analyzing the RRDE voltammograms according to equation (S1) and equation (S2), respectively:

$$X_{H_2O_2} (\%) = 100 \cdot \frac{2I_r / N}{-I_d + I_r / N} \quad (S1)$$

$$n = \frac{-4I_d}{-I_d + I_r / N} \quad (S2)$$

where  $I_d$  and  $I_r$  denote the disk and ring currents, respectively, after the background correction described above, and  $N$  is the collection efficiency (0.424) provided by the manufacturer (BAS Co.). Nyquist plots were measured by applying a root mean square alternating current voltage at 5 mV in the frequency range from 1 to 1.0 MHz at 0.7 V versus the RHE in an O<sub>2</sub>-saturated 0.1 mol dm<sup>-3</sup> H<sub>2</sub>SO<sub>4</sub> solution using a potentiostat equipped with a frequency response analyzer (SP-150, Bio-Logic Science Instruments, Seyssinet-Pariset, Isère, France), which was connected to the three-electrode cell used for the abovementioned ORR activity and selectivity measurements. The solution resistance between the working electrode and

reference electrode,  $R$ , was determined by the high-frequency intercept of the Nyquist plots, and all the  $E_d$  values were corrected with the resistance according to equation (S3).

$$E = E_d + |I_d|R \quad (S3)$$

After the initial activity evaluation at  $m = 1.50 \text{ mg cm}^{-2}$ , accelerated degradation tests were performed using a startup/shutdown protocol for automotive fuel cells proposed by the fuel cell commercialization conference in Japan (FCCJ),<sup>S2</sup> in which  $E_d$  was cycled between 1.0 and 1.5 V at a scan rate of  $0.5 \text{ V s}^{-1}$  in  $\text{N}_2$ -saturated electrolyte. After 5,000 cycles, the ORR activity was evaluated as described above. The amount of titanium ions dissolved in the electrolyte solution after 5,000 startup/shutdown cycles were measured using an inductively coupled plasma (ICP) spectrometer (5100 ICP-OES, Agilent Technologies. Inc., Santa Clara, California, U.S.).

## **S2. Crystal structures and chemical states of N-TiO<sub>2</sub>/S-TiN and N, P-TiO<sub>2</sub>/S-TiN catalysts**

Fig. S1 shows XRD patterns and Raman spectra of previously reported N-TiO<sub>2</sub>/S-TiN<sup>S3</sup> and N, P-TiO<sub>2</sub>/S-TiN catalysts synthesized by using two different phosphorous sources, H<sub>3</sub>PO<sub>2</sub><sup>S1</sup> and H<sub>3</sub>PO<sub>4</sub>.<sup>S3</sup> All the N-TiO<sub>2</sub>/S-TiN and N, P-TiO<sub>2</sub>/S-TiN catalysts display a single TiN phase. The single TiN phase of the N, P-TiO<sub>2</sub>/S-TiN catalyst is well reproduced in this study as shown in Fig. 1(b) despite the difference in the used quartz tube, tube furnace and N<sub>2</sub>-pyrolysis temperature as described in section **S1**. The Raman spectra were acquired with a 532 nm-laser. All catalysts display two peaks at ~410 cm<sup>-1</sup> and ~600 cm<sup>-1</sup>, which are assigned to the optical vibration modes, E<sub>g</sub> and A<sub>1g</sub>, respectively of rutile TiO<sub>2</sub> with oxygen vacancies.<sup>S1,S3</sup>

Fig. S2 shows the XP spectra of N, P-TiO<sub>2</sub>/S-TiN catalysts. The peak binding energies of previously reported N, P-TiO<sub>2</sub>/S-TiN catalysts in Ti 2p, N 1s and P 2p regions shown in Fig. S2 are same as those of N, P, S-TiO<sub>2</sub>/S-TiN catalyst shown in Fig. 1(e). The area fraction of N-doped TiO<sub>2</sub> phase in the Ti 2p region of N, P, S-TiO<sub>2</sub>/S-TiN catalyst shown in Fig. 1(e) is substantially lower than that of N, P-TiO<sub>2</sub>/S-TiN catalysts shown in Fig. S2 because N, P, S-TiO<sub>2</sub>/S-TiN catalyst was oxidized by NH<sub>4</sub>F-annealing as revealed by XRD analyses with Fig. 1(b).

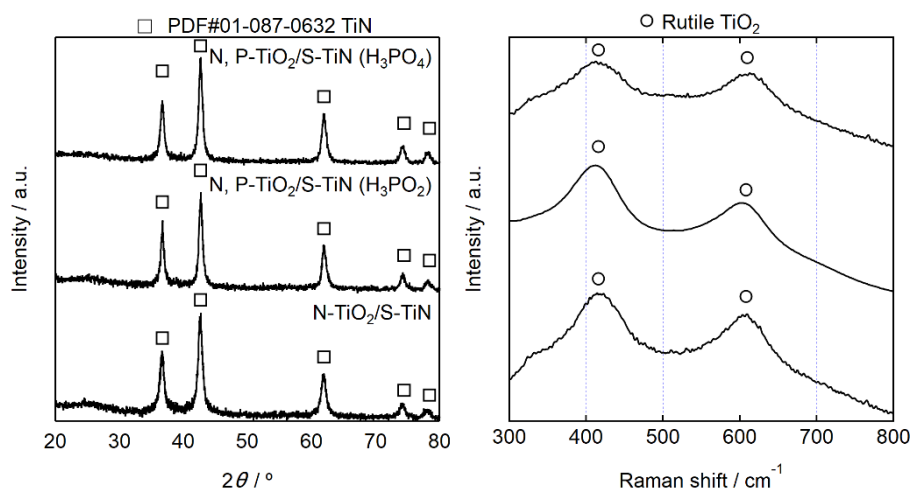

**Fig. S1** (Left) X-ray diffraction (XRD) patterns and (right) Raman spectra of N-TiO<sub>2</sub>/S-TiN (bottom) and N, P-TiO<sub>2</sub>/S-TiN catalysts synthesized using two different phosphorous sources, H<sub>3</sub>PO<sub>2</sub> (middle)<sup>S1</sup> and H<sub>3</sub>PO<sub>4</sub> (top).<sup>S3</sup> Reproduced with permissions.<sup>S1,S3</sup>

Copyrights 2019, 2020, Royal Society of Chemistry, American Chemical Society.

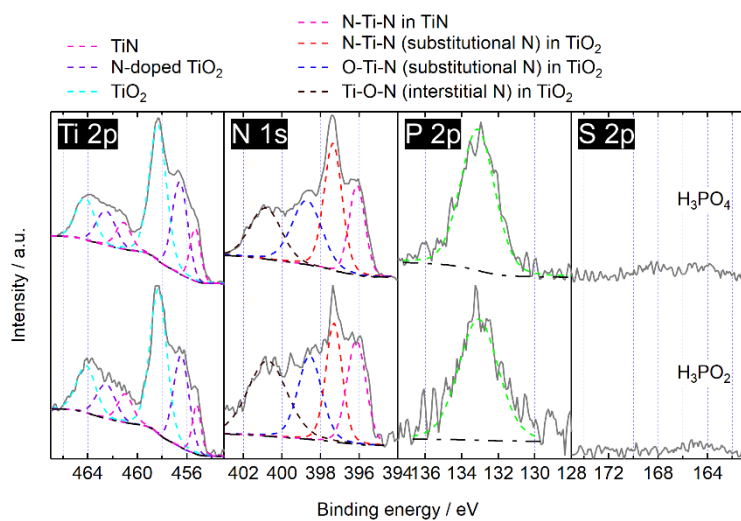

**Fig. S2** X-ray photoelectron (XP) spectra of N, P-TiO<sub>2</sub>/S-TiN catalysts synthesized using two different phosphorous sources, H<sub>3</sub>PO<sub>2</sub><sup>S1</sup> and H<sub>3</sub>PO<sub>4</sub>.<sup>S3</sup> Reproduced with permissions.<sup>S1,S3</sup> Copyrights 2019, 2020, Royal Society of Chemistry, American Chemical Society.

### **S3. Effect of NH<sub>4</sub>F-annealing atmosphere on the crystal structure and ORR activity of N, P, S-TiO<sub>2</sub>/S-TiN catalysts**

Fig. S3 shows X-ray diffraction (XRD) patterns and RDE voltammograms of the N, P, S-TiO<sub>2</sub>/S-TiN catalysts synthesized by annealing N, P-TiO<sub>2</sub>/S-TiN with NH<sub>4</sub>F at 1,223 K under three different flowing gases, N<sub>2</sub> with 0.5 dm<sup>3</sup> min<sup>-1</sup>, 10% v/v H<sub>2</sub>/Ar with 0.1 dm<sup>3</sup> min<sup>-1</sup> and 10% v/v H<sub>2</sub>/Ar with 0.5 dm<sup>3</sup> min<sup>-1</sup>. A single TiN phase of N, P-TiO<sub>2</sub>/S-TiN before annealing shown in Fig. 1(b) is oxidized to form the mixture of TiN and anatase/rutile TiO<sub>2</sub> phases after NH<sub>4</sub>F-annealing under N<sub>2</sub>. The mixed phases retains with substantially lower TiN content when the flowing gas is switched to 10% v/v H<sub>2</sub>/Ar with 0.1 dm<sup>3</sup> min<sup>-1</sup>. When the H<sub>2</sub>/Ar-flow rate is increased to 0.5 dm<sup>3</sup> min<sup>-1</sup>, a single TiN phase of N, P-TiO<sub>2</sub>/S-TiN remains during the annealing. These results indicate that oxygen contaminants in the quartz tube used for the annealing reacted with the catalyst sample to form TiO<sub>2</sub> phases. We have previously reported that oxygen contaminants in flowing 5% v/v H<sub>2</sub>/Ar gas react with Hf<sub>2</sub>ON<sub>2</sub> nanoparticles at 1,223 K to oxidize them to form a HfO<sub>2</sub> phase.<sup>S3</sup> Highly reductive 10% v/v H<sub>2</sub>/Ar gas with a high flow rate used in this study suppresses the oxidation of TiN. However, the ORR activity decreases significantly by changing the gas from N<sub>2</sub> to 10% v/v H<sub>2</sub>/Ar with the identical flow rate of 0.5 dm<sup>3</sup> min<sup>-1</sup>, indicating that the formation of the anatase/rutile mixture is necessary for the ORR activity. When the 10% v/v H<sub>2</sub>/Ar gas flow rate is 0.1 dm<sup>3</sup> min<sup>-1</sup> to have the mixture of TiN and anatase/rutile TiO<sub>2</sub> phases, the ORR activity is still lower than that obtained at N<sub>2</sub> with 0.5 dm<sup>3</sup> min<sup>-1</sup> due to the lower TiN content to have insufficient conductivity of the catalyst given by TiN.

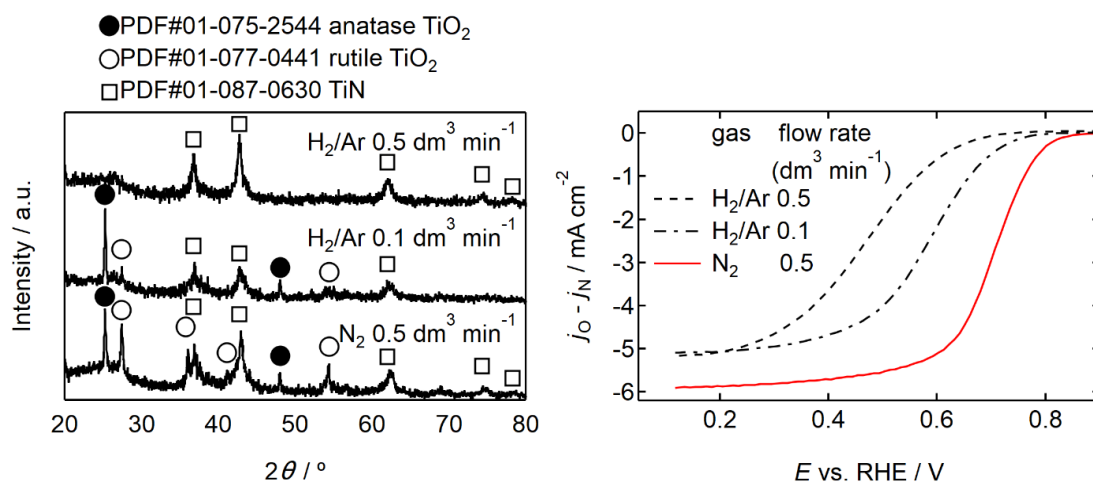

**Fig. S3** (left) X-ray diffraction (XRD) patterns and (right) rotating disk electrode (RDE) voltammograms of N, P, S- $\text{TiO}_2$ /S-TiN after  $\text{NH}_4\text{F}$ -annealing at 1,223 K for 1 h under three different gas atmospheres,  $\text{N}_2$  with 0.5  $\text{dm}^3 \text{min}^{-1}$ , 10% v/v  $\text{H}_2/\text{Ar}$  with 0.1  $\text{dm}^3 \text{min}^{-1}$  and 10% v/v  $\text{H}_2/\text{Ar}$  with 0.5  $\text{dm}^3 \text{min}^{-1}$ . The mass ratio of  $\text{NH}_4\text{F}$  to N, P- $\text{TiO}_2$ /S-TiN was fixed at 3 for all the catalysts. The scans were performed in  $\text{N}_2$  and  $\text{O}_2$  atmospheres at a rotation speed of 1,500 revolutions per minute (rpm) and a cathodic scan rate of  $-5 \text{ mV s}^{-1}$  in 0.1 mol  $\text{dm}^{-3}$   $\text{H}_2\text{SO}_4$  solution.

#### S4. TEM images of N, P, S-TiO<sub>2</sub>/S-TiN

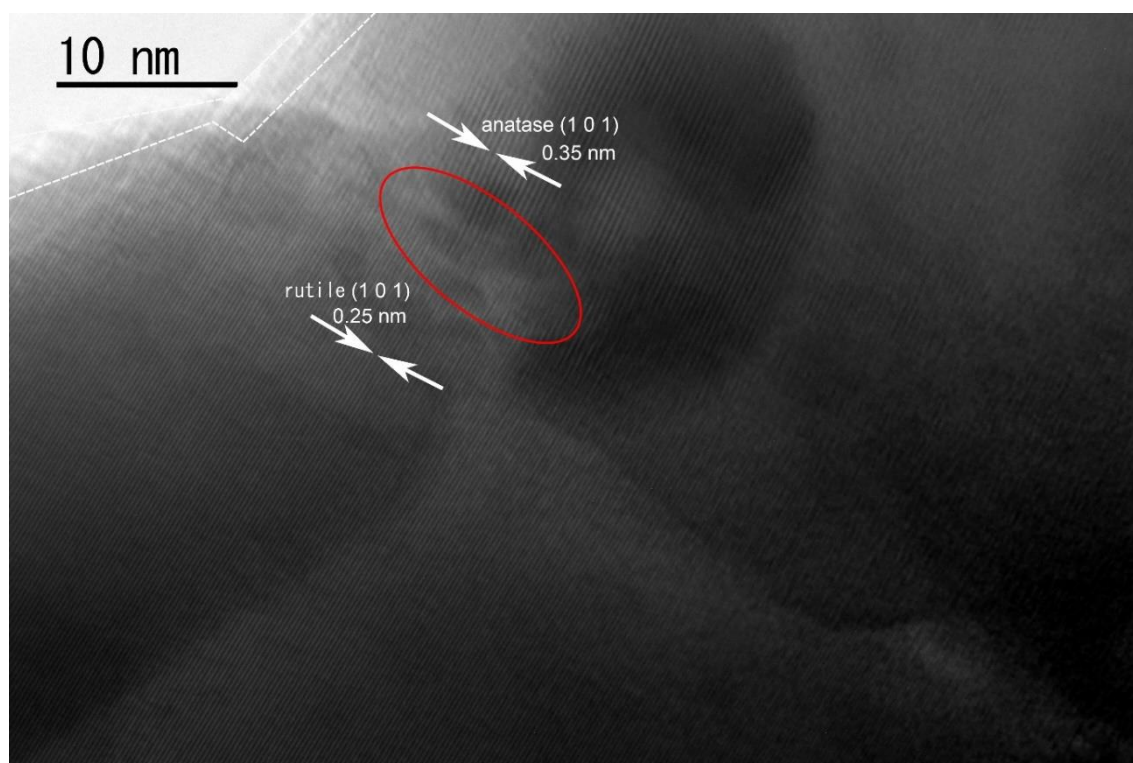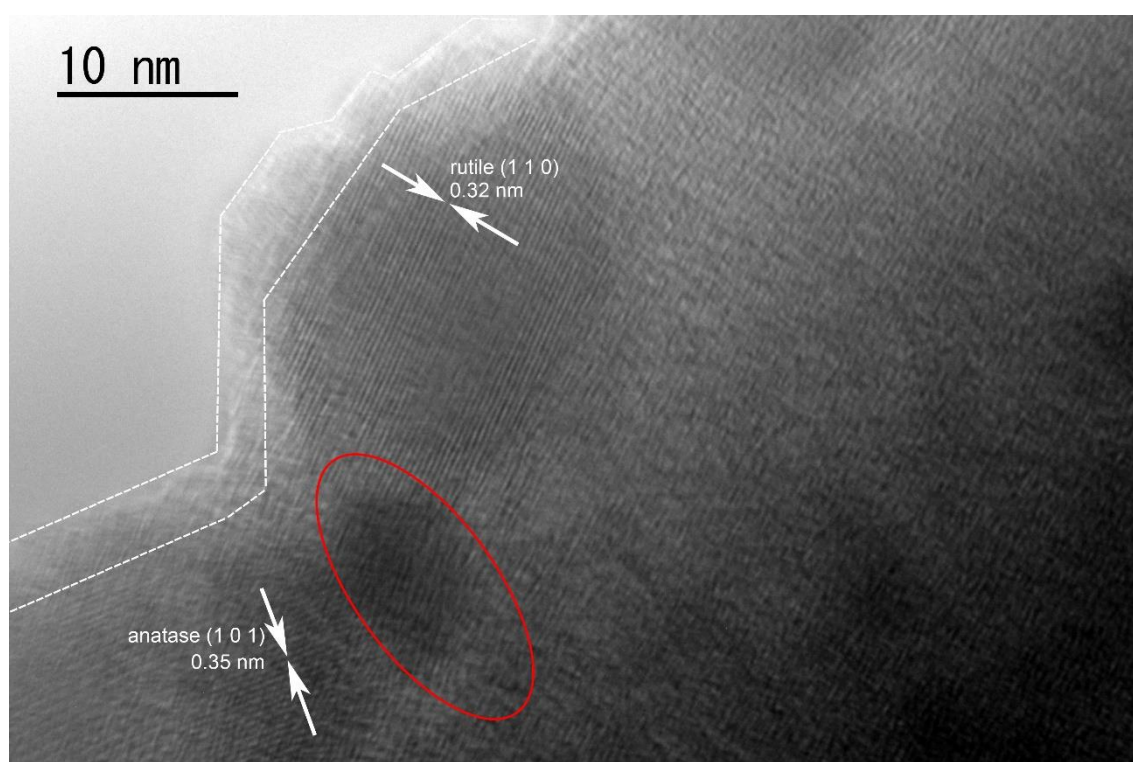

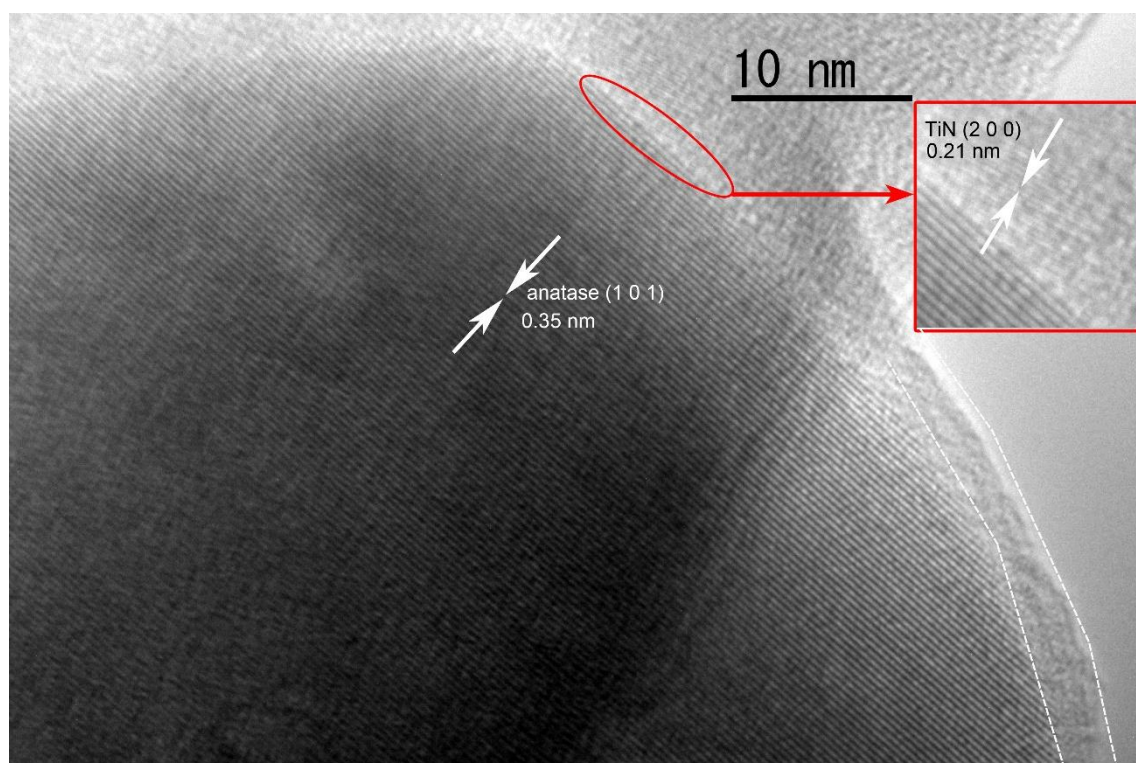

**Fig. S4** Transmission electron microscopy (TEM) images of N, P, S-TiO<sub>2</sub>/S-TiN.

## S5. Surface analyses of elements from precursors

Fig. S5 shows a S 2p spectrum of N, P-TiO<sub>2</sub>/S-TiN before NH<sub>4</sub>F-annealing. No peaks are found from the spectrum, indicating the absence of sulfur species on the surface.

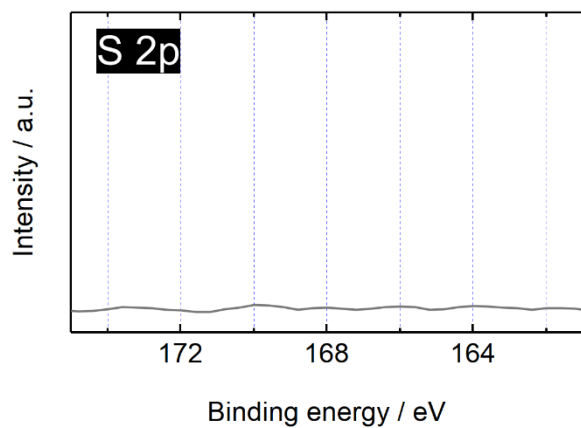

**Fig. S5** A XP S 2p spectrum of N, P-TiO<sub>2</sub>/S-TiN.

## **S6. Effect of the mass ratio of NH<sub>4</sub>F to N, P-TiO<sub>2</sub>/S-TiN on the crystal structure and ORR activity of N, P, S-TiO<sub>2</sub>**

Fig. S6 shows XRD patterns and RDE voltammograms of N, P, S-TiO<sub>2</sub>/S-TiN catalysts synthesized by annealing the mixture of NH<sub>4</sub>F and N, P-TiO<sub>2</sub>/S-TiN at three different mass ratios of NH<sub>4</sub>F to N, P-TiO<sub>2</sub>/S-TiN, 1, 3 and 5. The TiN content decreases while anatase TiO<sub>2</sub> content increases when the NH<sub>4</sub>F to N, P-TiO<sub>2</sub>/S-TiN ratio is increased from 1 to 5, indicating that TiN is broken by NH<sub>4</sub>F during the annealing at 1,223 K to form anatase/rutile TiO<sub>2</sub> phase. Anatase transforms irreversibly to rutile with increasing the temperature and the phase transition starts typically at 873–973 K in air for bulk pure TiO<sub>2</sub>.<sup>S5</sup> However, Yu *et al.* reported that fluorine ions released from NH<sub>4</sub>F prevent the phase transition of anatase to rutile at 973 K in air.<sup>S6</sup> Although the annealing temperature used to synthesize three N, P, S-TiO<sub>2</sub>/S-TiN catalysts was much higher, 1,223 K and the annealing atmosphere was under N<sub>2</sub> gas flow, the results shown in Fig. S6 (left) indicate that NH<sub>4</sub>F prevents the anatase to rutile transformation, similar to the previous work.<sup>S6</sup> Besides, S<sup>2-</sup> which substituted for O atoms in TiO<sub>2</sub> retained anatase phase as discussed in the main text. The NH<sub>4</sub>F to N, P-TiO<sub>2</sub>/S-TiN mass ratio significantly affects the ORR activity, as shown in Fig. S6 (right). The activity increases significantly with increasing the NH<sub>4</sub>F to N, P-TiO<sub>2</sub>/S-TiN mass ratio from 1 to 3 then decreases a little with a further increase to 5. These results indicate that active sites are produced with the formation of anatase/rutile TiO<sub>2</sub> mixture from TiN. The TiN is a well-known metallic nitride to display  $4.6 \times 10^4 \text{ S cm}^{-1}$  of electrical conductivity, which is 17 orders of magnitude higher than that of a semiconductor TiO<sub>2</sub>.<sup>S7</sup> Thus, ORR activity decreases when the NH<sub>4</sub>F to N, P-TiO<sub>2</sub>/S-TiN mass ratio is increased from 3 to the highest, 5 owing to the smallest TiN content to lose its electrical conductivity.

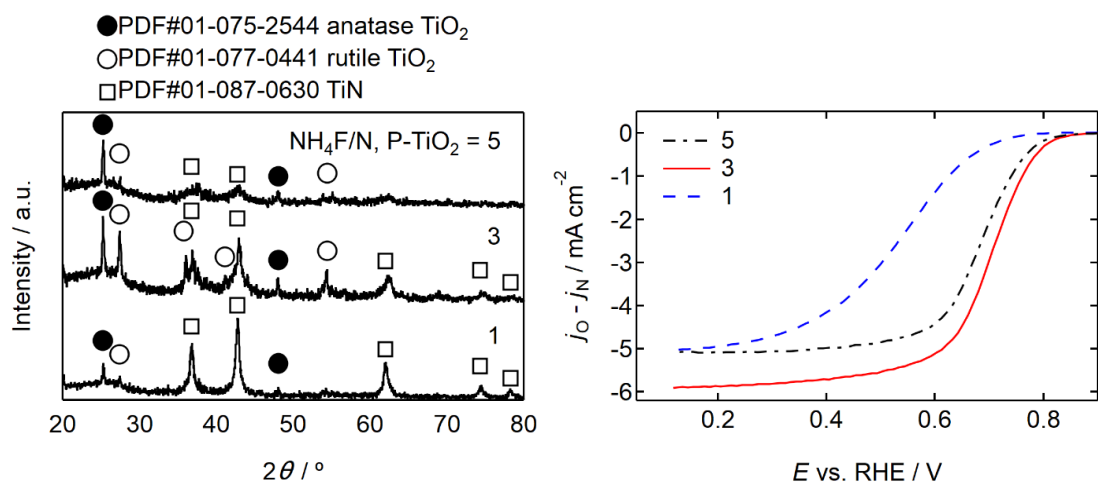

**Fig. S6** (left) XRD patterns and (right) RDE voltammograms of N, P, S-TiO<sub>2</sub>/S-TiN for three different mass ratios of NH<sub>4</sub>F to N, P-TiO<sub>2</sub>/S-TiN, at 1, 3 and 5. The NH<sub>4</sub>F annealing was performed at 1,223 K for 1 h under N<sub>2</sub> with 0.5 dm<sup>3</sup> min<sup>-1</sup>. The scans were performed in N<sub>2</sub> and O<sub>2</sub>, at a rotation speed of 1500 rpm and a cathodic scan rate of -5 mV s<sup>-1</sup> in 0.1 mol dm<sup>-3</sup> H<sub>2</sub>SO<sub>4</sub> solution.

### S7. Effect of annealing conditions on the ORR activity of N, P, S-TiO<sub>2</sub>/S-TiN catalysts

Fig. S7 shows RDE voltammograms of N, P, S-TiO<sub>2</sub>/S-TiN synthesized at different temperatures, durations and N<sub>2</sub> gas flow rates during the annealing of NH<sub>4</sub>F and N, P-TiO<sub>2</sub>/S-TiN mixture at the optimized NH<sub>4</sub>F to N, P-TiO<sub>2</sub>/S-TiN mass ratio, 3 revealed in section S6. The optimized annealing conditions for the ORR activity of N, P, S-TiO<sub>2</sub>/S-TiN are revealed to 1,223 K for 1 h under N<sub>2</sub> with 0.5 dm<sup>3</sup> min<sup>-1</sup>.

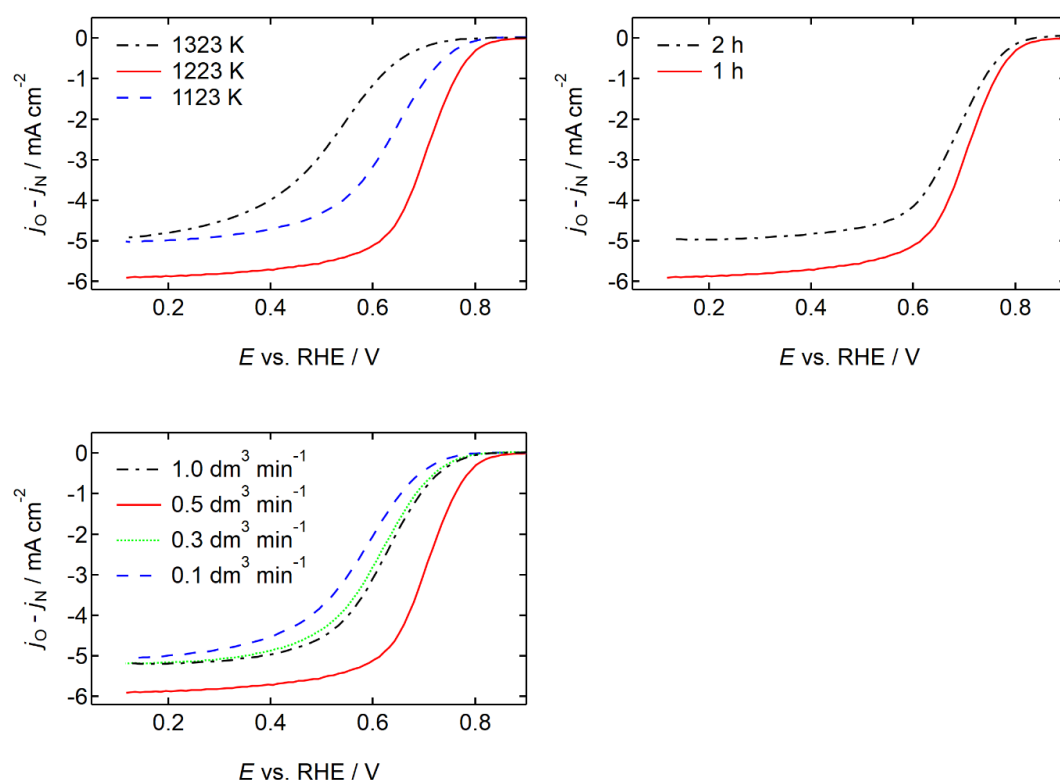

**Fig. 7** RDE voltammograms of N, P, S-TiO<sub>2</sub>/S-TiN for (left top) three different NH<sub>4</sub>F-annealing temperatures at 1,123, 1,223 and 1,323 K for a fixed duration of 1 h under N<sub>2</sub> with 0.5 dm<sup>3</sup> min<sup>-1</sup>, (right top) two different NH<sub>4</sub>F-annealing durations, 1 and 2 h at a fixed temperature of 1,223 K under N<sub>2</sub> with 0.5 dm<sup>3</sup> min<sup>-1</sup> and (bottom) four different N<sub>2</sub> gas flow rates of 0.1, 0.3, 0.5 and 1.0 dm<sup>3</sup> min<sup>-1</sup> during NH<sub>4</sub>F-annealing at a fixed temperature and duration of 1,223 K and 1 h, respectively. The mass ratio of NH<sub>4</sub>F to N, P-TiO<sub>2</sub>/S-TiN was fixed at 3 for all the catalysts. The scans were performed in N<sub>2</sub> and O<sub>2</sub>, at a rotation speed of 1,500 rpm and a cathodic scan rate of -5 mV s<sup>-1</sup> in 0.1 mol dm<sup>-3</sup> H<sub>2</sub>SO<sub>4</sub> solution.

## **S8. Effect of sulfur species on ORR activity of N, P, S-TiO<sub>2</sub>/S-TiN**

To reveal the role of sulfur species originated from the titanium source of N, P, S-TiO<sub>2</sub>/S-TiN, TiOSO<sub>4</sub>, it was replaced with a sulfur-free titanium source, (NH<sub>4</sub>)<sub>2</sub>TiF<sub>6</sub>. Then N, P-TiO<sub>2</sub>/TiN catalysts were synthesized under conditions identical to those of N, P, S-TiO<sub>2</sub>/S-TiN catalysts which exhibited the highest ORR activity. Fig. S8 (left) shows XRD patterns of the N, P-TiO<sub>2</sub>/TiN synthesized from (NH<sub>4</sub>)<sub>2</sub>TiF<sub>6</sub> before and after NH<sub>4</sub>F-annealing at the optimized conditions revealed in section S6 and S7. A single TiN phase of N, P-TiO<sub>2</sub>/TiN from (NH<sub>4</sub>)<sub>2</sub>TiF<sub>6</sub> before NH<sub>4</sub>F-annealing is converted to a mixture of anatase/rutile TiO<sub>2</sub> and TiN phases after the NH<sub>4</sub>F-annealing at 1,223 K under N<sub>2</sub> gas. The changes in crystal structure during NH<sub>4</sub>F-annealing shown in Fig. S8 (left) are similar to those of N, P, S-TiO<sub>2</sub>/S-TiN from TiOSO<sub>4</sub> shown in Fig. 1 (b). However, the activity is not similar as shown in Fig. S8 (right). The ORR activity of N, P, S-TiO<sub>2</sub>/S-TiN from TiOSO<sub>4</sub> is much higher than N, P-TiO<sub>2</sub>/TiN from (NH<sub>4</sub>)<sub>2</sub>TiF<sub>6</sub>, indicating the necessity of sulfur species. The Tafel slope of N, P, S-TiO<sub>2</sub>/S-TiN from TiOSO<sub>4</sub> and N, P-TiO<sub>2</sub>/TiN from (NH<sub>4</sub>)<sub>2</sub>TiF<sub>6</sub> are 60 and 95 mV dec<sup>-1</sup>, respectively. Although the RDE voltammograms were corrected with solution resistance measured by the Nyquist plots, the electrical resistance of catalyst layers could affect the voltammograms. The lower Tafel slope of N, P, S-TiO<sub>2</sub>/S-TiN from TiOSO<sub>4</sub> would be due to the lower electrical resistance of the N, P, S-TiO<sub>2</sub>/S-TiN when compared with N, P-TiO<sub>2</sub>/TiN from (NH<sub>4</sub>)<sub>2</sub>TiF<sub>6</sub> as S-doping has been used to reduce the electrical resistance of TiO<sub>2</sub>.<sup>S8, S9</sup>

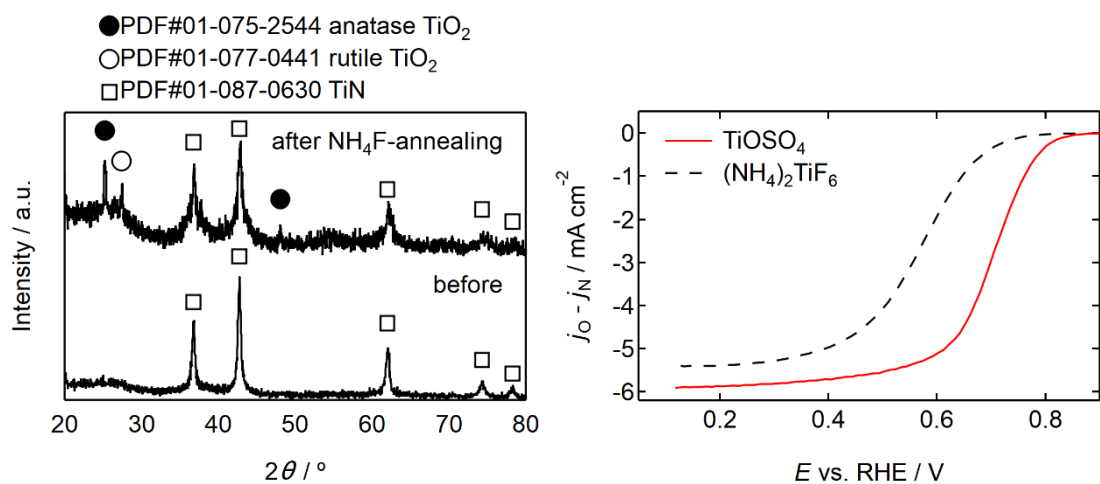

**Fig. S8** (left) XRD patterns of N, P-TiO<sub>2</sub>/S-TiN synthesized from (NH<sub>4</sub>)<sub>2</sub>TiF<sub>6</sub> before and after NH<sub>4</sub>F-annealing and (right) RDE voltammograms of N, P-TiO<sub>2</sub>/S-TiN and N, P, S-TiO<sub>2</sub>/S-TiN synthesized from (NH<sub>4</sub>)<sub>2</sub>TiF<sub>6</sub> and TiOSO<sub>4</sub>, respectively. For both two catalysts, the mass ratio of NH<sub>4</sub>F to N, P-TiO<sub>2</sub>/(S-)TiN was set at 3 and the NH<sub>4</sub>F-annealing was performed at 1,223 K for 1 h under N<sub>2</sub> with 0.5 dm<sup>3</sup> min<sup>-1</sup>. The scans were performed in N<sub>2</sub> and O<sub>2</sub>, at a rotation speed of 1500 rpm and a cathodic scan rate of -5 mV s<sup>-1</sup> in 0.1 mol dm<sup>-3</sup> H<sub>2</sub>SO<sub>4</sub> solution.

### **S9. Comparison of ORR activity of oxide, oxynitride and nitride catalysts in acidic media**

The measure of ORR activity of non-PGM catalysts has not been standardized yet. A half-wave potential ( $E_{1/2}$ ), i.e., the potential where half of the limiting current is obtained would be the fairest measure of activity and the values of oxide, oxynitride and nitride catalysts reported to date are compared in Table S1.

**Table S1.** ORR activity of carbon-supported/carbon-support-free oxide, oxynitride and nitride catalysts in acidic media.

| Catalyst                                                                                                              | Support                              | $m^{*1}$                               | $\omega^{*2}$ | $\nu^{*3}$ | Electrolyte                                                | $E_{1/2}^{*4}$ | source           |
|-----------------------------------------------------------------------------------------------------------------------|--------------------------------------|----------------------------------------|---------------|------------|------------------------------------------------------------|----------------|------------------|
| <b>N, P, S-TiO<sub>2</sub></b>                                                                                        | <b>S-TiN</b>                         | <b>0.86</b>                            | <b>1,500</b>  | <b>5</b>   | <b>0.1 mol dm<sup>-3</sup> H<sub>2</sub>SO<sub>4</sub></b> | <b>0.72</b>    | <b>This work</b> |
| N-ZrO <sub>2</sub><br>(ZrO <sub>x</sub> N <sub>y</sub> )                                                              | Multi-walled carbon nanotube (MWCNT) | 1.4                                    | 1,600         | 5          | 0.1 mol dm <sup>-3</sup> H <sub>2</sub> SO <sub>4</sub>    | 0.70           | S10              |
| N, P-TiO <sub>2</sub><br>(shell)                                                                                      | S-TiN<br>(core)                      | 0.86                                   | 1,500         | 5          | 0.1 mol dm <sup>-3</sup> H <sub>2</sub> SO <sub>4</sub>    | 0.67           | S3               |
| TiO <sub>2</sub>                                                                                                      | MWCNT                                | 1.5                                    | 1,600         | 5          | 0.1 mol dm <sup>-3</sup> H <sub>2</sub> SO <sub>4</sub>    | 0.64           | S11              |
| N-TiO <sub>2</sub>                                                                                                    | Carbon black                         | 1.0                                    | 1,500         | 5          | 0.1 mol dm <sup>-3</sup> H <sub>2</sub> SO <sub>4</sub>    | 0.48           | S12              |
| N-TiO <sub>2</sub>                                                                                                    | Ti <sub>4</sub> O <sub>7</sub>       | 2.0                                    | 1,500         | 5          | 0.1 mol dm <sup>-3</sup> H <sub>2</sub> SO <sub>4</sub>    | 0.63           | S13              |
| N-TiO <sub>2</sub><br>(shell)                                                                                         | TiN<br>(core)                        | 2.0                                    | 1,500         | 5          | 0.1 mol dm <sup>-3</sup> H <sub>2</sub> SO <sub>4</sub>    | 0.68           | S14              |
| N-TiO <sub>2</sub><br>(shell)                                                                                         | Nitrided carbon<br>(core)            | 0.28                                   | 1,600         | 10         | 0.5 mol dm <sup>-3</sup> H <sub>2</sub> SO <sub>4</sub>    | 0.44           | S15              |
| Hf <sub>2</sub> ON <sub>2</sub>                                                                                       | Carbon black                         | 1.0                                    | 1,500         | 5          | 0.1 mol dm <sup>-3</sup> H <sub>2</sub> SO <sub>4</sub>    | 0.54           | S16              |
| TaO <sub>x</sub>                                                                                                      | Carbon black                         | 0.1                                    | 1,600         | 5          | 0.1 mol dm <sup>-3</sup> H <sub>2</sub> SO <sub>4</sub>    | 0.60           | S17              |
| N-Ta <sub>2</sub> O <sub>5</sub>                                                                                      | MWCNT                                | 0.51-<br>0.57 <sup>*5</sup><br>(oxide) | 1,600         | 5          | 0.1 mol dm <sup>-3</sup> H <sub>2</sub> SO <sub>4</sub>    | 0.65           | S18              |
| Ta <sub>2</sub> O <sub>5</sub>                                                                                        | MWCNT                                | 1.6                                    | 1,600         | 5          | 0.1 mol dm <sup>-3</sup> H <sub>2</sub> SO <sub>4</sub>    | 0.57           | S19              |
| N-Ta <sub>2</sub> O <sub>5</sub> /Ta <sub>3</sub> N <sub>5</sub><br>(shell)                                           | Nitrided carbon<br>(core)            | 0.28                                   | 1,600         | 10         | 0.5 mol dm <sup>-3</sup> H <sub>2</sub> SO <sub>4</sub>    | 0.42           | S20              |
| Na <sub>2</sub> Ta <sub>8</sub> O <sub>21-x</sub> /<br>Ta <sub>2</sub> O <sub>5</sub> /Ta <sub>3</sub> N <sub>5</sub> | Reduced<br>graphene oxide            | 0.817                                  | 1,600         | 10         | 0.1 mol dm <sup>-3</sup> HClO <sub>4</sub>                 | 0.42           | S21              |
| Co <sub>0.50</sub> Mo <sub>0.50</sub> O <sub>y</sub> N <sub>z</sub><br>(Co-Mo <sub>2</sub> N)                         | Carbon black                         | 0.7                                    | 1,600         | 10         | 0.1 mol dm <sup>-3</sup> HClO <sub>4</sub>                 | 0.41           | S22              |
| CoWO <sub>1.2</sub> N/CoN <sub>x</sub>                                                                                | Carbon black                         | 0.142                                  | 2,000         | 5          | 0.5 mol dm <sup>-3</sup> H <sub>2</sub> SO <sub>4</sub>    | 0.41           | S23              |
| Co <sub>0.50</sub> Mo <sub>0.50</sub> N <sub>y</sub>                                                                  | Nitrogen-doped carbon nanocage       | 0.097                                  | 2,500         | 10         | 0.5 mol dm <sup>-3</sup> H <sub>2</sub> SO <sub>4</sub>    | 0.57           | S24              |

\*1 Catalyst (including support when used) loading in mg cm<sup>-2</sup>.

\*2 Rotation speed in rpm

\*3 Scan rate in mV s<sup>-1</sup>.

\*4 Half-wave potential in V versus RHE.

\*5  $m$ , i.e., loading of N-Ta<sub>2</sub>O<sub>5</sub> and MWCNT is not described and only N-Ta<sub>2</sub>O<sub>5</sub> loading is available.

## S10. Comparison of PGM-free catalysts' durability against startup/shutdown cycles of fuel cell vehicles (FCVs)

In most of the works on PGM-free catalysts, the durability against load cycles for FCVs, in which potential is cycled between 0.6 (load on) and 0.95/1.0 V (load off), have been evaluated. During the startup and shutdown of FCVs, the cathodes face with much more oxidative potentials up to 1.5 V by a so-called reverse-current decay mechanism as described in the main body of the text. For evaluating the durability against the startup and shutdown of FCVs, the Fuel Cell Commercialization Conference of Japan (FCCJ) first set the protocol, in which potential is cycled between 1.0 and 1.5 V at  $0.5 \text{ V s}^{-1}$  in an inert ( $\text{N}_2$ - or Ar-saturated) acidic electrolyte.<sup>S2</sup> The startup/shutdown durability test results of some limited number of PGM-free catalysts reported to date are compared in Table S2.

**Table S2.** Startup/shutdown durability of PGM-free catalysts in acidic media.

| Catalyst                                                    | Electrolyte                                                | Accelerated degradation test (ADT)         |              |                    |                                    | source           |
|-------------------------------------------------------------|------------------------------------------------------------|--------------------------------------------|--------------|--------------------|------------------------------------|------------------|
|                                                             |                                                            | Protocol                                   | Cycle number | $\Delta E_{1/2}^*$ | Limiting current plateau after ADT |                  |
| <b>N, P, S-TiO<sub>2</sub>/S-TiN</b>                        | <b>0.1 mol dm<sup>-3</sup> H<sub>2</sub>SO<sub>4</sub></b> | <b>1.0 V–1.5 V at 0.5 V s<sup>-1</sup></b> | <b>5,000</b> | <b>0.02 V</b>      | <b>present</b>                     | <b>This work</b> |
| N, P-TiO <sub>2</sub> /S-TiN                                | 0.1 mol dm <sup>-3</sup> H <sub>2</sub> SO <sub>4</sub>    | 1.0 V–1.5 V at 0.5 V s <sup>-1</sup>       | 5,000        | 0.08 V             | absent                             | S1               |
| N-Ti <sub>0.8</sub> Zr <sub>0.2</sub> O <sub>2</sub> /S-TiN | 0.1 mol dm <sup>-3</sup> H <sub>2</sub> SO <sub>4</sub>    | 1.0 V–1.5 V at 0.5 V s <sup>-1</sup>       | 5,000        | 0.04 V             | absent                             | S25              |
| Fe/N/C                                                      | 0.1 mol dm <sup>-3</sup> HClO <sub>4</sub>                 | 1.2 V–1.5 V at 0.5 V s <sup>-1</sup>       | 5,000        | 0.099 V            | absent                             | S26              |
| Fe/N/C                                                      | 0.1 mol dm <sup>-3</sup> HClO <sub>4</sub>                 | 1.0 V–1.5 V at 0.1 V s <sup>-1</sup>       | 6,200        | 0.27 V             | absent                             | S27              |
| Fe/N/C                                                      | 0.5 mol dm <sup>-3</sup> H <sub>2</sub> SO <sub>4</sub>    | 1.0 V–1.5 V at 0.5 V s <sup>-1</sup>       | 5,000        | 0.035 V            | present                            | S28              |
| Fe/N/C                                                      | 0.5 mol dm <sup>-3</sup> H <sub>2</sub> SO <sub>4</sub>    | 1.0 V–1.5 V at 0.5 V s <sup>-1</sup>       | 1,110        | 0.040 V            | N/A                                | S29              |

\* The  $E_{1/2}$  difference between before and after the ADT cycles,  $E_{1/2}$  (initial)–  $E_{1/2}$  (after ADT cycles).

### S11. Durability of other N, P, S-TiO<sub>2</sub>/S-TiN catalysts against startup/shutdown cycles

Startup/shutdown durability of N, P, S-TiO<sub>2</sub>/S-TiN catalysts synthesized under different NH<sub>4</sub>F-annealing conditions was evaluated and the results are shown in Fig. S9. These catalysts display high durability against the startup/shutdown protocols in which  $E$  was cycled between 1.0 and 1.5 V and the difference in  $E_{1/2}$  before and after 5,000 cycles is similar to that observed from Fig. 3, indicating the excellent repeatability in startup/shutdown durability. In Fig. S9 (left), the current density at  $E \leq \sim 0.6$  V increased after the 5,000 cycles. Although the precise mechanism for the increase in current density is not clear at this stage, one of the reasons will be the removal of inactive species during the cycles to improve the mass transport properties, similar to the results reported by Wu *et al.*<sup>S30</sup>

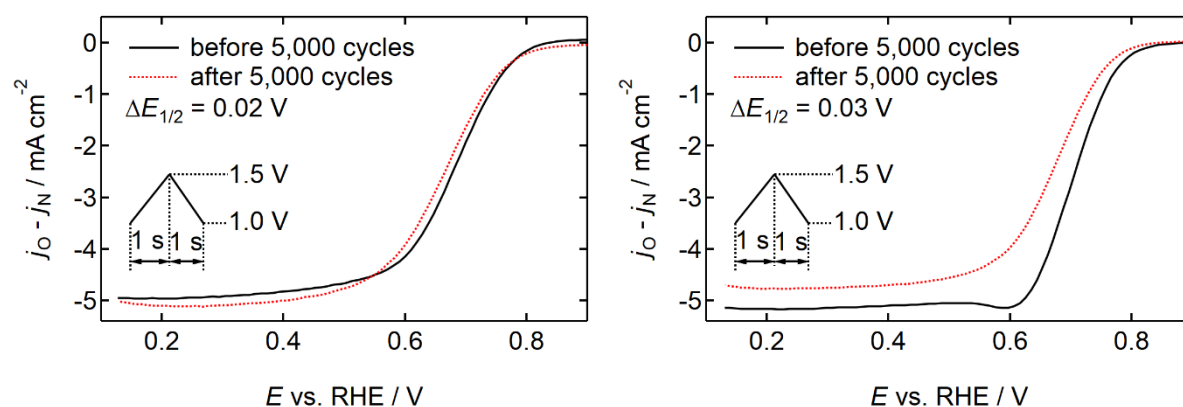

**Fig. S9** RDE voltammograms of N, P, S-TiO<sub>2</sub>/S-TiN catalysts before (solid curve) and after (dashed curve) 5,000 potential cycles between 1.0 and 1.5 V vs. reversible hydrogen electrode (RHE) at 0.5 V s<sup>-1</sup> in 0.1 mol dm<sup>-3</sup> H<sub>2</sub>SO<sub>4</sub> solution. Before and after 5,000 cycles, the scans were performed in N<sub>2</sub> and O<sub>2</sub> atmospheres at a rotation speed of 1,500 rpm and a cathodic scan rate of -5 mV s<sup>-1</sup> for evaluating the activity. The N, P, S-TiO<sub>2</sub>/S-TiN catalysts were synthesized by annealing at 1,223 K for 2 h with the mass ratio of NH<sub>4</sub>F to N, P-TiO<sub>2</sub>/S-TiN of 3 (left) and at 1,223 K for 1 h with the mass ratio of NH<sub>4</sub>F to N, P-TiO<sub>2</sub>/S-TiN of 5 (right). In both cases, the annealing was performed under N<sub>2</sub> with 0.5 dm<sup>3</sup> min<sup>-1</sup>.

## S12. Changes in crystal structure of N, P, S-TiO<sub>2</sub>/S-TiN catalysts during ORR

Stability of N, P, S-TiO<sub>2</sub>/S-TiN catalyst's crystal structure was evaluated by XRD patterns shown in Fig. S10. Catalyst layers after electrochemical ORR tests were carefully peeled off from the GC disk electrodes. The XRD pattern shown in the top of Fig. S10 is from N, P, S-TiO<sub>2</sub>/S-TiN particles and Nafion used in the catalyst layers. All the peaks observed from as prepared N, P, S-TiO<sub>2</sub>/S-TiN without Nafion shown in the bottom of Fig. S10 retained during ORR tests, indicating that the all the phases are stable.

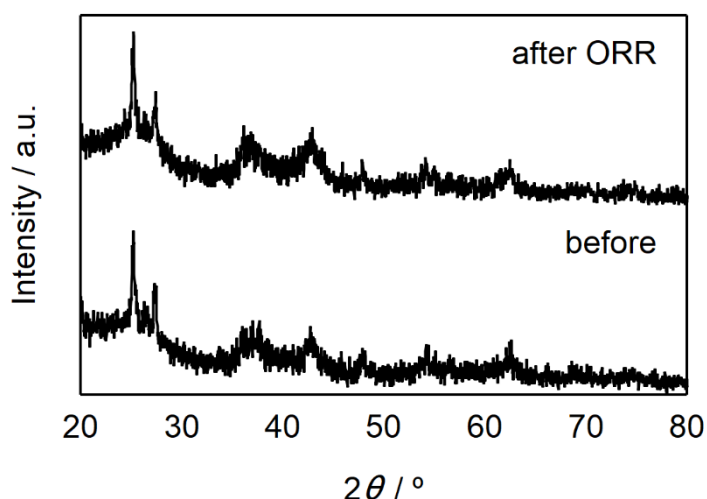

**Fig. S10** XRD patterns of N, P, S-TiO<sub>2</sub>/S-TiN catalyst (bottom) before and (top) after ORR tests.

### S13. Changes in morphology of N, P, S-TiO<sub>2</sub>/S-TiN catalysts during startup/shutdown cycles

Fig. S11 shows TEM images of N, P, S-TiO<sub>2</sub>/S-TiN catalysts before and after 5,000 startup/shutdown cycles. Thin sheets remained during the cycles, indicating the morphological stability of N, P, S-TiO<sub>2</sub>/S-TiN. Because N, P, S-TiO<sub>2</sub>/S-TiN catalysts after 5,000 cycles contains Nafion ionomer, clear high resolution images could not be obtained.

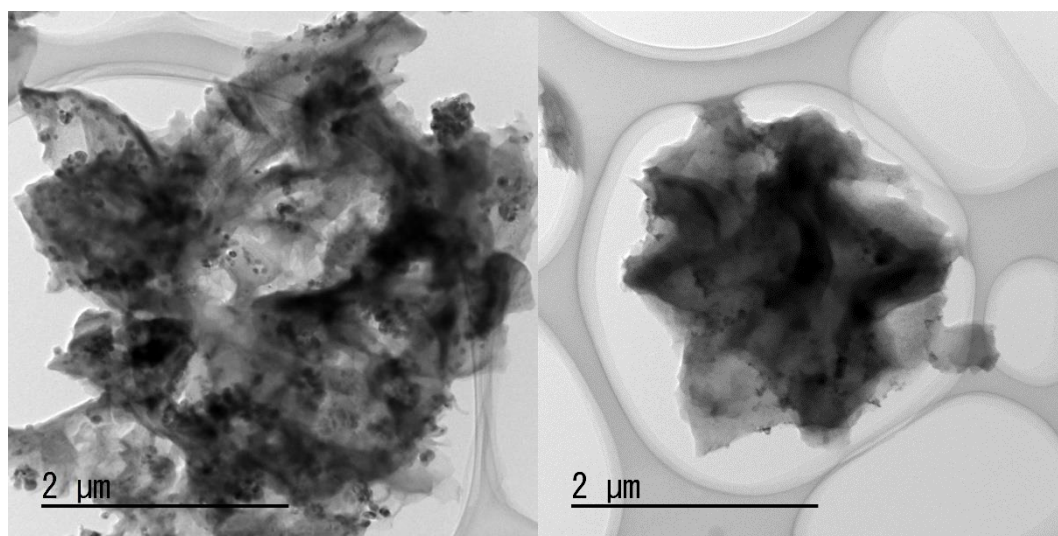

**Fig. S11** TEM images of N, P, S-TiO<sub>2</sub>/S-TiN catalysts before (left) and after (right) 5,000 potential cycles between 1.0 and 1.5 V vs. reversible hydrogen electrode (RHE) at 0.5 V s<sup>-1</sup> in 0.1 mol dm<sup>-3</sup> H<sub>2</sub>SO<sub>4</sub> solution. The N, P, S-TiO<sub>2</sub>/S-TiN catalyst after 5,000 cycles contains Nafion ionomer used in the catalyst layer.

## Supporting References

- S1 M. Chisaka, R. Xiang, S. Maruyama and H. Daiguji, *ACS Appl. Energy Mater.*, 2020, **3**, 9866.
- S2 A. Ohma, K. Shinohara, A. Iiyama, T. Yoshida and A. Daimaru, *ECS Trans.*, 2011, **41**, 775.
- S3 M. Chisaka and H. Morioka, *Catal. Sci. Technol.*, 2019, **9**, 611.
- S4 M. Chisaka, Y. Suzuki, T. Iijima, Y. Ishihara, R. Inada and Y. Sakurai, *ECS Electrochem. Lett.*, 2012, **3**, F1.
- S5 D. A. H. Hanaor and C. C. Sorrell, *J. Mater. Sci.*, 2011, **46**, 855.
- S6 J. C. Yu, J. Yu, W. Ho, Z. Jiang and L. Zhang, *Chem. Mater.*, 2002, **14**, 3808.
- S7 F. Cardarelli, in *Materials Handbook: A Concise Desktop Reference*, 2nd ed., (Ed. F. Cardarelli), Springer-Verlag, London, UK, 2008, Ch. 10.
- S8 J. Ni, S. Fu, C. Wu, J. Maier, Y. Yu and L. Li, *Adv. Mater.*, 2016, **28**, 2259.
- S9 W. Jiao, N. Li, L. Wang, F. Li, G. Liu and H. M. Cheng, *Chem. Commun.*, 2013, **49**, 3461.
- S10 M. Chisaka, A. Ishihara, H. Morioka, T. Nagai, S. Yin, Y. Ohgi, K. Matsuzawa, S. Mitsushima and K. Ota, *ACS Omega*, 2017, **2**, 678.
- S11 T. Hayashi, A. Ishihara, N. Uehara, Y. Kohno, K. Matsuzawa, S. Mitsushima and K. Ota, *Electrochemistry*, 2015, **83**, 807.
- S12 M. Chisaka, Y. Ando and N. Itagaki, *J. Mater. Chem. A*, 2016, **4**, 2501.
- S13 M. Chisaka, Y. Ando, Y. Yamamoto and N. Itagaki, *Electrochim. Acta*, 2016, **214**, 165.
- S14 M. Chisaka, Y. Yamamoto, N. Itagaki and Y. Hattori, *ACS Appl. Energy Mater.*, 2018,

1, 211.

S15 M. Wassner, M. Eckardt, C. Gebauer, N. Hüsing and J. Behm, *ChemElectroChem*, 2016, **3**, 1641.

S16 M. Chisaka, Y. Suzuki, T. Iijima and Y. Sakurai, *J. Phys. Chem. C*, 2011, **115**, 20610.

S17 J. Seo, D. H. Anjum, K. Takanabe, J. Kubota and K. Domen, *Electrochim. Acta*, 2014, **149**, 76.

S18 N. Uehara, A. Ishihara, T. Nagai, M. Matsumoto, H. Imai, Y. Kohno, K. Matsuzawa, S. Mitsushima and K. Ota, *Electrochim. Acta*, 2015, **182**, 789.

S19 A. Ishihara, M. Chisaka, Y. Ohgi, K. Matsuzawa, S. Mitsushima and K. Ota, *Phys. Chem. Chem. Phys.*, 2015, **17**, 7643.

S20 M. Wassner, M. Eckardt, C. Gebauer, G. R. Bourret, N. Hüsing and R. J. Behm, *Electrochim. Acta*, 2017, **227**, 367.

S21 G. Zhang, D. Sebastián, X. Zhang, Q. Wei, C. Lo Vecchio, J. Zhang, V. Baglio, W. Wang, S. Sun, A. S. Aricò and A. C. Tavares, *Adv. Energy Mater.*, 2020, **10**, 2000075.

S22 B. Cao, G. M. Veith, R. E. Diaz, J. Liu, E. A. Stach, R. R. Adzic and P. G. Khalifah, *Angew. Chem. Int. Ed. Engl.*, 2013, **52**, 10753.

S23 T. Ando, S. Izhar, H. Tominaga and M. Nagai, *Electrochim. Acta*, 2010, **55**, 2614.

S24 T. Sun, Q. Wu, R. Che, Y. Bu, Y. Jiang, Y. Li, L. Yang, X. Wang and Z. Hu, *ACS Catal.*, 2015, **5**, 1857.

S25 M. Chisaka, R. Xiang, S. Maruyama and H. Daiguji, *Energy Fuels*, 2022, **36**, 539.

S26 C. H. Choi, C. Baldizzone, J. P. Grote, A. K. Schuppert, F. Jaouen and K. J. J. Mayrhofer, *Angew. Chem. Int. Ed. Engl.*, 2015, **54**, 12753.

S27 K. Strickland, E. Miner, Q. Jia, U. Tylus, N. Ramaswamy, W. Liang, M. T. Sougrati, F. Jaouen and S. Mukerjee, *Nat. Commun.*, 2015, **6**, 7343.

S28 X. Zhao, X. Yang, M. Wang, S. Hwang, S. Karakalos, M. Chen, Z. Qiao, L. Wang, B. Liu, Q. Ma, D. A. Cullen, D. Su, H. Yang, H. Y. Zang, Z. Feng and G. Wu, *Appl. Catal. B*,

2020, **279**, 119400.

S29 A. Muthukrishnan, Y. Nabaе, T. Hayakawa, T. Okajima, T. Ohsaka, *Catal. Sci. Technol.*, 2015, **5**, 475.

S30 G. Wu, K. L. More, C. M. Johnston and P. Zelenay, *Science*, 2011, **332**, 443.
